# Supplementary material for: The Effect of Training-Induced Visual Imageability on Electrophysiological Correlates of Novel Word Processing
Source: MDPI journal article supplement (doi:10.3390/biomedicines6030075), 2018-07-01
Supplement: s1 [file s1]

The effect of training-induced visual imageability on electrophysiological correlates of novel word processing

Supplementary material

Table S1

*Psycholinguistic variables of the real concrete and abstract words rated in a pre-study.*

| Scale        | Concreteness | <i>M</i> | ( <i>SE</i> ) | <i>df</i> | <i>t</i> | <i>p</i> |
|--------------|--------------|----------|---------------|-----------|----------|----------|
| Concreteness | concrete     | 6.356    | (0.028)       | 46.024    | 57.018   | < .001   |
|              | abstract     | 3.096    | (0.05)        |           |          |          |
| Imageability | concrete     | 6.662    | (0.033)       | 39.787    | 44.067   | < .001   |
|              | abstract     | 3.062    | (0.075)       |           |          |          |
| Arousal      | concrete     | 2.937    | (0.142)       | 50.746    | -3.724   | < .001   |
|              | abstract     | 3.888    | (0.212)       |           |          |          |
| Valence      | concrete     | 0.224    | (0.082)       | 34.614    | -0.597   | .555     |
|              | abstract     | 0.389    | (0.264)       |           |          |          |
| Action       | concrete     | 4.498    | (0.196)       | 50.73     | 7.106    | < .001   |
|              | abstract     | 2.822    | (0.131)       |           |          |          |
| Emotion      | concrete     | 2.176    | (0.057)       | 34.85     | -10.911  | < .001   |
|              | abstract     | 4.219    | (0.178)       |           |          |          |
| Perception   | concrete     | 3.463    | (0.087)       | 58        | 2.127    | .038     |
|              | abstract     | 3.162    | (0.112)       |           |          |          |
| Thinking     | concrete     | 1.737    | (0.079)       | 47.014    | -17.017  | < .001   |
|              | abstract     | 4.394    | (0.134)       |           |          |          |

*Note.* Mean (*M*) ratings  $\pm$  one standard error (*SE*) of the ratings on eight different scales (from 1 to 7, except for valence from -3 to +3) for the 30 concrete and 30 abstract words provided by 39 separate raters. Degrees of freedom (*df*), statistic of the independent t-test (*t*) and significance values (*p*) are provided on the right. For Action, Emotion, Perception and Thinking, participants rated the strength of the words' association with these aspects.
