# Supplementary material for: The Effect of Training-Induced Visual Imageability on Electrophysiological Correlates of Novel Word Processing
Source: MDPI journal article supplement (doi:10.3390/biomedicines6030075), 2018-07-01
Supplement: s1 [file s1]

The effect of training-induced visual imageability on electrophysiological correlates of novel word processing

Table S3

*Descriptive statistics of ERP amplitudes elicited by novel OPic, SPic and NoPic words.*

| Frontality                | Category | Laterality     |                |                |
|---------------------------|----------|----------------|----------------|----------------|
|                           |          | left           | midline        | right          |
| N400 (300 - 500 ms)       |          |                |                |                |
| Frontal                   | OPic     | -0.823 (0.342) | -0.980 (0.346) | -0.815 (0.322) |
|                           | SPic     | -1.024 (0.369) | -1.068 (0.335) | -0.729 (0.318) |
|                           | NoPic    | -0.817 (0.260) | -1.052 (0.276) | -0.762 (0.314) |
| Central                   | OPic     | -0.286 (0.178) | -0.699 (0.320) | 0.021 (0.278)  |
|                           | SPic     | -0.581 (0.240) | -0.663 (0.255) | -0.001 (0.239) |
|                           | NoPic    | -0.379 (0.176) | -0.793 (0.286) | -0.079 (0.280) |
| Parietal                  | OPic     | 0.945 (0.321)  | 1.190 (0.362)  | 1.525 (0.316)  |
|                           | SPic     | 0.966 (0.286)  | 1.186 (0.252)  | 1.557 (0.315)  |
|                           | NoPic    | 0.889 (0.298)  | 1.124 (0.332)  | 1.384 (0.255)  |
| early N700 (500 - 700 ms) |          |                |                |                |
| Frontal                   | OPic     | -1.247 (0.339) | -0.852 (0.348) | -0.902 (0.281) |
|                           | SPic     | -1.264 (0.364) | -0.944 (0.328) | -0.813 (0.342) |
|                           | NoPic    | -0.885 (0.313) | -0.729 (0.316) | -0.707 (0.330) |
| Central                   | OPic     | -0.160 (0.212) | -0.210 (0.275) | -0.134 (0.225) |
|                           | SPic     | -0.144 (0.224) | 0.050 (0.211)  | 0.012 (0.243)  |
|                           | NoPic    | 0.064 (0.230)  | 0.089 (0.241)  | 0.037 (0.241)  |
| Parietal                  | OPic     | 1.672 (0.295)  | 2.027 (0.285)  | 1.366 (0.247)  |
|                           | SPic     | 1.574 (0.293)  | 2.127 (0.266)  | 1.372 (0.274)  |
|                           | NoPic    | 1.326 (0.302)  | 1.886 (0.231)  | 1.122 (0.222)  |
| late N700 (700 - 900 ms)  |          |                |                |                |
| Frontal                   | OPic     | -1.416 (0.305) | -1.293 (0.284) | -1.022 (0.245) |
|                           | SPic     | -1.241 (0.309) | -0.809 (0.315) | -0.525 (0.305) |
|                           | NoPic    | -0.895 (0.294) | -0.619 (0.272) | -0.360 (0.235) |
| Central                   | OPic     | -0.109 (0.160) | -0.092 (0.223) | -0.170 (0.182) |
|                           | SPic     | -0.240 (0.203) | 0.119 (0.257)  | 0.219 (0.203)  |
|                           | NoPic    | -0.002 (0.187) | 0.277 (0.244)  | 0.202 (0.195)  |
| Parietal                  | OPic     | 1.626 (0.221)  | 1.530 (0.270)  | 0.967 (0.174)  |
|                           | SPic     | 1.195 (0.195)  | 1.412 (0.308)  | 1.009 (0.219)  |
|                           | NoPic    | 0.992 (0.181)  | 1.252 (0.244)  | 0.691 (0.191)  |

*Note.* Mean amplitudes in  $\mu\text{V}$  ( $\pm$  one standard error) of the N400, N700a and N700b elicited by novel OPic, SPic and NoPic words.
