# Supplementary material for: The Effect of Training-Induced Visual Imageability on Electrophysiological Correlates of Novel Word Processing
Source: MDPI journal article supplement (doi:10.3390/biomedicines6030075), 2018-07-01
Supplement: s1 [file s1]

The effect of training-induced visual imageability on electrophysiological correlates of novel word processing

Table S2

*Descriptive statistics of ERP amplitudes elicited by real concrete and abstract words.*

| Frontality                | Concreteness | Laterality     |                |                |
|---------------------------|--------------|----------------|----------------|----------------|
|                           |              | left           | midline        | right          |
| N400 (300 - 500 ms)       |              |                |                |                |
| Frontal                   | concrete     | -1.254 (0.319) | -1.356 (0.322) | -0.990 (0.324) |
|                           | abstract     | -0.992 (0.288) | -1.170 (0.297) | -0.951 (0.285) |
| Central                   | concrete     | -0.511 (0.185) | -1.262 (0.295) | -0.175 (0.256) |
|                           | abstract     | -0.396 (0.196) | -0.873 (0.264) | -0.086 (0.226) |
| Parietal                  | concrete     | 0.978 (0.273)  | 0.729 (0.347)  | 1.508 (0.322)  |
|                           | abstract     | 0.969 (0.259)  | 0.975 (0.306)  | 1.406 (0.296)  |
| early N700 (500 - 700 ms) |              |                |                |                |
| Frontal                   | concrete     | -1.320 (0.287) | -0.990 (0.226) | -0.843 (0.197) |
|                           | abstract     | -0.794 (0.262) | -0.571 (0.241) | -0.564 (0.232) |
| Central                   | concrete     | -0.172 (0.144) | -0.218 (0.237) | 0.118 (0.175)  |
|                           | abstract     | 0.003 (0.186)  | 0.010 (0.217)  | 0.220 (0.163)  |
| Parietal                  | concrete     | 1.349 (0.206)  | 1.556 (0.215)  | 1.136 (0.160)  |
|                           | abstract     | 1.046 (0.221)  | 1.369 (0.163)  | 0.817 (0.179)  |
| late N700 (700 - 900 ms)  |              |                |                |                |
| Frontal                   | concrete     | -0.606 (0.166) | -0.561 (0.191) | -0.419 (0.168) |
|                           | abstract     | -0.556 (0.193) | -0.231 (0.189) | -0.111 (0.188) |
| Central                   | concrete     | 0.071 (0.114)  | 0.209 (0.166)  | 0.129 (0.120)  |
|                           | abstract     | 0.061 (0.151)  | 0.535 (0.170)  | 0.503 (0.134)  |
| Parietal                  | concrete     | 0.704 (0.136)  | 0.712 (0.156)  | 0.259 (0.083)  |
|                           | abstract     | 0.638 (0.176)  | 0.951 (0.170)  | 0.477 (0.141)  |

*Note.* Mean amplitudes in  $\mu\text{V}$  ( $\pm$  one standard error) of the N400, early N700 and late N700 elicited by the real concrete and abstract words.
